# Supplementary material for: A U-shaped association between Lipid Accumulation Product and Periodontitis among U.S Adults: A cross-sectional study from NHANES 2009-2014
Source: Research Square preprint supplement (doi:10.21203/rs.3.rs-6709254/v1), 2025-05-28
Supplement: Supplementary file 1 [file e95690be2e61b2a7bcb59e16.docx]

**Figure S1** Forest plots of stratified analysis of Lipid accumulation product with periodontitis
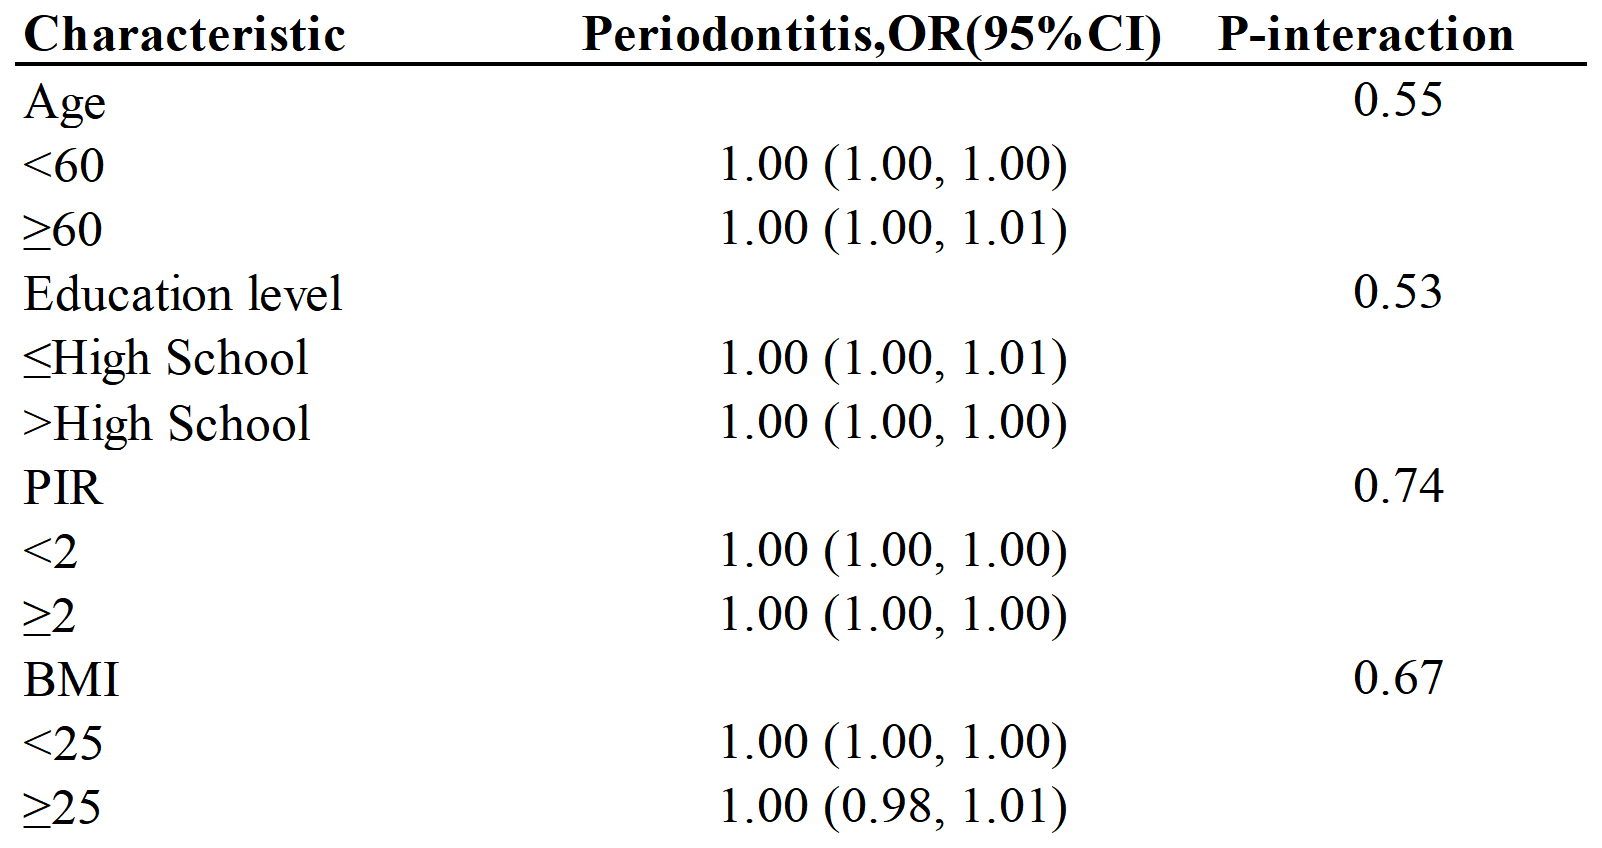


Note: Age, gender, race/ethnicity, education level, marital status, PIR, BMI, smoking status, alcohol consumption, Hypertension, and Diabetes were all adjusted except the variable itself.

|  | **Periodontitis, OR (95%CI), P-value** | |
| --- | --- | --- |
|  | **Adjust I (Complete case)** | **Adjust II (Multiple imputation)** |
| LAP | 1.00 (1.00, 1.00) 0.4052 | 1.01 (0.99, 1.04) 0.2810 |
| LAP quartile |  |  |
| Q1 | 1.0 | 1.0 |
| Q2 | 0.91 (0.63, 1.32) 0.6278 | 0.87 (0.61, 1.24) 0.4351 |
| Q3 | 0.90 (0.60, 1.36) 0.6246 | 0.88 (0.59, 1.30) 0.5214 |
| Q4 | 0.71 (0.45, 1.10) 0.1257 | 0.74 (0.49, 1.13) 0.1680 |

**Table S1** Logistic regression analyses of the associations between Lipid accumulation product and periodontitis

Note: Adjusted for age, gender, race/ethnicity, education level, marital status, PIR, BMI, smoking status, alcohol consumption, Hypertension, and Diabetes. Multiple imputation techniques were employed to address missing covariate data.

Abbreviations: LAP: Lipid accumulation product; OR: odd ratio; CI: confidence interval
